# Supplementary material for: Conspecific coprophagy stimulates normal development in a germ-free model invertebrate
Source: PeerJ. 2019 May 13;7:e6914. doi: 10.7717/peerj.6914 (PMC6521811; doi:10.7717/peerj.6914)
Supplement: Supplemental Information 3 — Raw data includes duration of days spent in each instar in the column durval and cumulative days to each molt in the column moltval along with categorical variables associated with instar and treatment. [file peerj-07-6914-s003.csv]

Harvest	ID	Treatment	Instar	TrtDr	Indur	durval	TrtMlt	molt	moltval
ThirdGT	GT3.3d	GT	5	GT1	1	6	GT1	1	6
ThirdGT	GT3.3c	GT	5	GT1	1	6	GT1	1	6
ThirdGT	GT3.3b	GT	5	GT1	1	6	GT1	1	6
ThirdGT	GT3.3a	GT	5	GT1	1	6	GT1	1	6
ThirdGT	GT2.3e	GT	5	GT1	1	7	GT1	1	7
ThirdGT	GT2.3d	GT	5	GT1	1	7	GT1	1	7
ThirdGT	GT2.3c	GT	5	GT1	1	7	GT1	1	7
ThirdGT	GT2.3b	GT	5	GT1	1	7	GT1	1	7
ThirdGT	GT2.3a	GT	5	GT1	1	5	GT1	1	5
ThirdGT	GT1.3a	GT	5	GT1	1	6	GT1	1	6
SecondGT	GT3.2c	GT	4	GT1	1	9	GT1	1	9
SecondGT	GT3.2b	GT	4	GT1	1	7	GT1	1	7
SecondGT	GT3.2a	GT	4	GT1	1	6	GT1	1	6
SecondGT	GT2.2f	GT	4	GT1	1	9	GT1	1	9
SecondGT	GT2.2e	GT	4	GT1	1	9	GT1	1	9
SecondGT	GT2.2d	GT	4	GT1	1	9	GT1	1	9
SecondGT	GT2.2c	GT	4	GT1	1	9	GT1	1	9
SecondGT	GT2.2b	GT	4	GT1	1	9	GT1	1	9
SecondGT	GT2.2a	GT	4	GT1	1	9	GT1	1	9
SecondGT	GT1.2c	GT	4	GT1	1	7	GT1	1	7
SecondGT	GT1.2b	GT	4	GT1	1	7	GT1	1	7
SecondGT	GT1.2a	GT	4	GT1	1	5	GT1	1	5
FirstGT	GT3.1c	GT	3	GT1	1	6	GT1	1	6
FirstGT	GT3.1b	GT	3	GT1	1	6	GT1	1	6
FirstGT	GT3.1a	GT	3	GT1	1	6	GT1	1	6
FirstGT	GT2.1f	GT	3	GT1	1	7	GT1	1	7
FirstGT	GT2.1e	GT	3	GT1	1	7	GT1	1	7
FirstGT	GT2.1d	GT	3	GT1	1	7	GT1	1	7
FirstGT	GT2.1c	GT	3	GT1	1	7	GT1	1	7
FirstGT	GT2.1b	GT	3	GT1	1	7	GT1	1	7
FirstGT	GT2.1a	GT	3	GT1	1	7	GT1	1	7
FirstGT	GT1.1c	GT	3	GT1	1	6	GT1	1	6
FirstGT	GT1.1b	GT	3	GT1	1	6	GT1	1	6
FirstGT	GT1.1a	GT	3	GT1	1	5	GT1	1	5
ThirdGF	GF3.3c	GF	5	GF1	1	9	GF1	1	9
ThirdGF	GF3.3b	GF	5	GF1	1	9	GF1	1	9
ThirdGF	GF3.3a	GF	5	GF1	1	9	GF1	1	9
ThirdGF	GF2.3f	GF	5	GF1	1	5	GF1	1	5
ThirdGF	GF2.3e	GF	5	GF1	1	5	GF1	1	5
ThirdGF	GF2.3d	GF	5	GF1	1	5	GF1	1	5
ThirdGF	GF2.3c	GF	5	GF1	1	5	GF1	1	5
ThirdGF	GF2.3b	GF	5	GF1	1	5	GF1	1	5
ThirdGF	GF2.3a	GF	5	GF1	1	5	GF1	1	5
ThirdGF	GF1.3c	GF	6	GF1	1	6	GF1	1	6
ThirdGF	GF1.3b	GF	6	GF1	1	6	GF1	1	6
ThirdGF	GF1.3a	GF	6	GF1	1	5	GF1	1	5
SecondGF	GF3.2c	GF	4	GF1	1	9	GF1	1	9
SecondGF	GF3.2b	GF	4	GF1	1	6	GF1	1	6
SecondGF	GF3.2a	GF	4	GF1	1	6	GF1	1	6
SecondGF	GF2.2f	GF	4	GF1	1	5	GF1	1	5
SecondGF	GF2.2e	GF	4	GF1	1	5	GF1	1	5
SecondGF	GF2.2d	GF	4	GF1	1	5	GF1	1	5
SecondGF	GF2.2c	GF	4	GF1	1	5	GF1	1	5
SecondGF	GF2.2b	GF	4	GF1	1	5	GF1	1	5
SecondGF	GF2.2a	GF	4	GF1	1	5	GF1	1	5
SecondGF	GF1.2c	GF	4	GF1	1	6	GF1	1	6
SecondGF	GF1.2b	GF	4	GF1	1	5	GF1	1	5
SecondGF	GF1.2a	GF	4	GF1	1	5	GF1	1	5
FirstGF	GF3.1c	GF	3	GF1	1	9	GF1	1	9
FirstGF	GF3.1b	GF	3	GF1	1	9	GF1	1	9
FirstGF	GF3.1a	GF	3	GF1	1	6	GF1	1	6
FirstGF	GF2.1f	GF	3	GF1	1	6	GF1	1	6
FirstGF	GF2.1e	GF	3	GF1	1	5	GF1	1	5
FirstGF	GF2.1d	GF	3	GF1	1	5	GF1	1	5
FirstGF	GF2.1c	GF	3	GF1	1	5	GF1	1	5
FirstGF	GF2.1b	GF	3	GF1	1	5	GF1	1	5
FirstGF	GF2.1a	GF	3	GF1	1	5	GF1	1	5
FirstGF	GF1.1d	GF	3	GF1	1	6	GF1	1	6
FirstGF	GF1.1c	GF	3	GF1	1	6	GF1	1	6
FirstGF	GF1.1b	GF	3	GF1	1	6	GF1	1	6
FirstGF	GF1.1a	GF	3	GF1	1	5	GF1	1	5
ThirdGT	GT3.3d	GT	5	GT2	2	9	GT2	2	15
ThirdGT	GT3.3c	GT	5	GT2	2	7	GT2	2	13
ThirdGT	GT3.3b	GT	5	GT2	2	7	GT2	2	13
ThirdGT	GT3.3a	GT	5	GT2	2	7	GT2	2	13
ThirdGT	GT2.3e	GT	5	GT2	2	6	GT2	2	13
ThirdGT	GT2.3d	GT	5	GT2	2	6	GT2	2	13
ThirdGT	GT2.3c	GT	5	GT2	2	6	GT2	2	13
ThirdGT	GT2.3b	GT	5	GT2	2	6	GT2	2	13
ThirdGT	GT2.3a	GT	5	GT2	2	8	GT2	2	13
ThirdGT	GT1.3a	GT	5	GT2	2	13	GT2	2	19
SecondGT	GT3.2c	GT	4	GT2	2	6	GT2	2	15
SecondGT	GT3.2b	GT	4	GT2	2	8	GT2	2	15
SecondGT	GT3.2a	GT	4	GT2	2	9	GT2	2	15
SecondGT	GT2.2f	GT	4	GT2	2	10	GT2	2	19
SecondGT	GT2.2e	GT	4	GT2	2	8	GT2	2	17
SecondGT	GT2.2d	GT	4	GT2	2	6	GT2	2	15
SecondGT	GT2.2c	GT	4	GT2	2	6	GT2	2	15
SecondGT	GT2.2b	GT	4	GT2	2	6	GT2	2	15
SecondGT	GT2.2a	GT	4	GT2	2	6	GT2	2	15
SecondGT	GT1.2c	GT	4	GT2	2	8	GT2	2	15
SecondGT	GT1.2b	GT	4	GT2	2	8	GT2	2	15
SecondGT	GT1.2a	GT	4	GT2	2	8	GT2	2	13
FirstGT	GT3.1c	GT	3	GT2	2	9	GT2	2	15
FirstGT	GT3.1b	GT	3	GT2	2	9	GT2	2	15
FirstGT	GT3.1a	GT	3	GT2	2	9	GT2	2	15
FirstGT	GT2.1f	GT	3	GT2	2	8	GT2	2	15
FirstGT	GT2.1e	GT	3	GT2	2	8	GT2	2	15
FirstGT	GT2.1d	GT	3	GT2	2	8	GT2	2	15
FirstGT	GT2.1c	GT	3	GT2	2	8	GT2	2	15
FirstGT	GT2.1b	GT	3	GT2	2	8	GT2	2	15
FirstGT	GT2.1a	GT	3	GT2	2	6	GT2	2	13
FirstGT	GT1.1c	GT	3	GT2	2	7	GT2	2	13
FirstGT	GT1.1b	GT	3	GT2	2	7	GT2	2	13
FirstGT	GT1.1a	GT	3	GT2	2	8	GT2	2	13
ThirdGF	GF3.3c	GF	5	GF2	2	11	GF2	2	20
ThirdGF	GF3.3b	GF	5	GF2	2	11	GF2	2	20
ThirdGF	GF3.3a	GF	5	GF2	2	8	GF2	2	17
ThirdGF	GF2.3f	GF	5	GF2	2	10	GF2	2	15
ThirdGF	GF2.3e	GF	5	GF2	2	10	GF2	2	15
ThirdGF	GF2.3d	GF	5	GF2	2	8	GF2	2	13
ThirdGF	GF2.3c	GF	5	GF2	2	8	GF2	2	13
ThirdGF	GF2.3b	GF	5	GF2	2	8	GF2	2	13
ThirdGF	GF2.3a	GF	5	GF2	2	6	GF2	2	11
ThirdGF	GF1.3c	GF	6	GF2	2	9	GF2	2	15
ThirdGF	GF1.3b	GF	6	GF2	2	9	GF2	2	15
ThirdGF	GF1.3a	GF	6	GF2	2	10	GF2	2	15
SecondGF	GF3.2c	GF	4	GF2	2	10	GF2	2	19
SecondGF	GF3.2b	GF	4	GF2	2	11	GF2	2	17
SecondGF	GF3.2a	GF	4	GF2	2	9	GF2	2	15
SecondGF	GF2.2f	GF	4	GF2	2	10	GF2	2	15
SecondGF	GF2.2e	GF	4	GF2	2	10	GF2	2	15
SecondGF	GF2.2d	GF	4	GF2	2	10	GF2	2	15
SecondGF	GF2.2c	GF	4	GF2	2	8	GF2	2	13
SecondGF	GF2.2b	GF	4	GF2	2	8	GF2	2	13
SecondGF	GF2.2a	GF	4	GF2	2	8	GF2	2	13
SecondGF	GF1.2c	GF	4	GF2	2	9	GF2	2	15
SecondGF	GF1.2b	GF	4	GF2	2	10	GF2	2	15
SecondGF	GF1.2a	GF	4	GF2	2	8	GF2	2	13
FirstGF	GF3.1c	GF	3	GF2	2	9	GF2	2	18
FirstGF	GF3.1b	GF	3	GF2	2	8	GF2	2	17
FirstGF	GF3.1a	GF	3	GF2	2	9	GF2	2	15
FirstGF	GF2.1f	GF	3	GF2	2	9	GF2	2	15
FirstGF	GF2.1e	GF	3	GF2	2	10	GF2	2	15
FirstGF	GF2.1d	GF	3	GF2	2	10	GF2	2	15
FirstGF	GF2.1c	GF	3	GF2	2	10	GF2	2	15
FirstGF	GF2.1b	GF	3	GF2	2	10	GF2	2	15
FirstGF	GF2.1a	GF	3	GF2	2	10	GF2	2	15
FirstGF	GF1.1d	GF	3	GF2	2	9	GF2	2	15
FirstGF	GF1.1c	GF	3	GF2	2	9	GF2	2	15
FirstGF	GF1.1b	GF	3	GF2	2	9	GF2	2	15
FirstGF	GF1.1a	GF	3	GF2	2	10	GF2	2	15
ThirdGT	GT3.3d	GT	5	GT3	3	9	GT3	3	24
ThirdGT	GT3.3c	GT	5	GT3	3	8	GT3	3	21
ThirdGT	GT3.3b	GT	5	GT3	3	8	GT3	3	21
ThirdGT	GT3.3a	GT	5	GT3	3	8	GT3	3	21
ThirdGT	GT2.3e	GT	5	GT3	3	10	GT3	3	23
ThirdGT	GT2.3d	GT	5	GT3	3	10	GT3	3	23
ThirdGT	GT2.3c	GT	5	GT3	3	8	GT3	3	21
ThirdGT	GT2.3b	GT	5	GT3	3	8	GT3	3	21
ThirdGT	GT2.3a	GT	5	GT3	3	6	GT3	3	19
ThirdGT	GT1.3a	GT	5	GT3	3	9	GT3	3	28
SecondGT	GT3.2c	GT	4	GT3	3	9	GT3	3	24
SecondGT	GT3.2b	GT	4	GT3	3	9	GT3	3	24
SecondGT	GT3.2a	GT	4	GT3	3	9	GT3	3	24
SecondGT	GT2.2f	GT	4	GT3	3	6	GT3	3	25
SecondGT	GT2.2e	GT	4	GT3	3	8	GT3	3	25
SecondGT	GT2.2d	GT	4	GT3	3	10	GT3	3	25
SecondGT	GT2.2c	GT	4	GT3	3	7	GT3	3	22
SecondGT	GT2.2b	GT	4	GT3	3	7	GT3	3	22
SecondGT	GT2.2a	GT	4	GT3	3	6	GT3	3	21
SecondGT	GT1.2c	GT	4	GT3	3	8	GT3	3	23
SecondGT	GT1.2b	GT	4	GT3	3	6	GT3	3	21
SecondGT	GT1.2a	GT	4	GT3	3	8	GT3	3	21
ThirdGF	GF3.3c	GF	5	GF3	3	18	GF3	3	38
ThirdGF	GF3.3b	GF	5	GF3	3	17	GF3	3	37
ThirdGF	GF3.3a	GF	5	GF3	3	17	GF3	3	34
ThirdGF	GF2.3f	GF	5	GF3	3	10	GF3	3	25
ThirdGF	GF2.3e	GF	5	GF3	3	8	GF3	3	23
ThirdGF	GF2.3d	GF	5	GF3	3	9	GF3	3	22
ThirdGF	GF2.3c	GF	5	GF3	3	8	GF3	3	21
ThirdGF	GF2.3b	GF	5	GF3	3	8	GF3	3	21
ThirdGF	GF2.3a	GF	5	GF3	3	10	GF3	3	21
ThirdGF	GF1.3c	GF	6	GF3	3	13	GF3	3	28
ThirdGF	GF1.3b	GF	6	GF3	3	13	GF3	3	28
ThirdGF	GF1.3a	GF	6	GF3	3	10	GF3	3	25
SecondGF	GF3.2c	GF	4	GF3	3	14	GF3	3	33
SecondGF	GF3.2b	GF	4	GF3	3	13	GF3	3	30
SecondGF	GF3.2a	GF	4	GF3	3	12	GF3	3	27
SecondGF	GF2.2f	GF	4	GF3	3	10	GF3	3	25
SecondGF	GF2.2e	GF	4	GF3	3	7	GF3	3	22
SecondGF	GF2.2d	GF	4	GF3	3	7	GF3	3	22
SecondGF	GF2.2c	GF	4	GF3	3	8	GF3	3	21
SecondGF	GF2.2b	GF	4	GF3	3	8	GF3	3	21
SecondGF	GF2.2a	GF	4	GF3	3	8	GF3	3	21
SecondGF	GF1.2c	GF	4	GF3	3	11	GF3	3	26
SecondGF	GF1.2b	GF	4	GF3	3	10	GF3	3	25
SecondGF	GF1.2a	GF	4	GF3	3	9	GF3	3	22
ThirdGF	GF3.3c	GF	5	GF4	4	8	GF4	4	46
ThirdGF	GF3.3b	GF	5	GF4	4	9	GF4	4	46
ThirdGF	GF3.3a	GF	5	GF4	4	12	GF4	4	46
ThirdGF	GF2.3f	GF	5	GF4	4	12	GF4	4	37
ThirdGF	GF2.3e	GF	5	GF4	4	14	GF4	4	37
ThirdGF	GF2.3d	GF	5	GF4	4	12	GF4	4	34
ThirdGF	GF2.3c	GF	5	GF4	4	13	GF4	4	34
ThirdGF	GF2.3b	GF	5	GF4	4	13	GF4	4	34
ThirdGF	GF2.3a	GF	5	GF4	4	11	GF4	4	32
ThirdGF	GF1.3c	GF	6	GF4	4	13	GF4	4	41
ThirdGF	GF1.3b	GF	6	GF4	4	13	GF4	4	41
ThirdGF	GF1.3a	GF	6	GF4	4	14	GF4	4	39
ThirdGT	GT2.3e	GT	5	GT4	4	10	GT4	4	33
ThirdGT	GT2.3d	GT	5	GT4	4	8	GT4	4	31
ThirdGT	GT2.3c	GT	5	GT4	4	10	GT4	4	31
ThirdGT	GT2.3b	GT	5	GT4	4	10	GT4	4	31
ThirdGT	GT2.3a	GT	5	GT4	4	9	GT4	4	28
SecondGT	GT3.2c	GT	4	GT4	4	12	GT4	4	36
SecondGT	GT3.2b	GT	4	GT4	4	11	GT4	4	35
SecondGT	GT3.2a	GT	4	GT4	4	9	GT4	4	33
